# Supplementary material
Source: PubMed Central journal article supplement (PMC5135271)
Supplement: jciinsight-1-90954-s001.pdf [file jciinsight-1-90954-s001.pdf]

## **Supplemental Information**

Development of an In Vitro Human Liver System for Interrogating Non-Alcoholic Steatohepatitis

Ryan Feaver<sup>1</sup>, Banumathi K. Cole<sup>1</sup>, Mark J. Lawson<sup>1</sup>, Stephen A. Hoang<sup>1</sup>, Svetlana Marukian<sup>1</sup>, Robert A. Figler<sup>1</sup>, Arun J. Sanyal<sup>2</sup>, Brian R. Wamhoff<sup>\*1</sup>, Ajit Dash<sup>1</sup>

<sup>1</sup>HemoShear Therapeutics LLC, Charlottesville, VA

<sup>2</sup>Virginia Commonwealth University School of Medicine Richmond, VA

\*Corresponding Author:

Brian R. Wamhoff, 501 Locust Ave., Charlottesville, VA 22902

Wamhoff@HemoShear.com

434-872-0196

## Supplemental Figures and Tables:

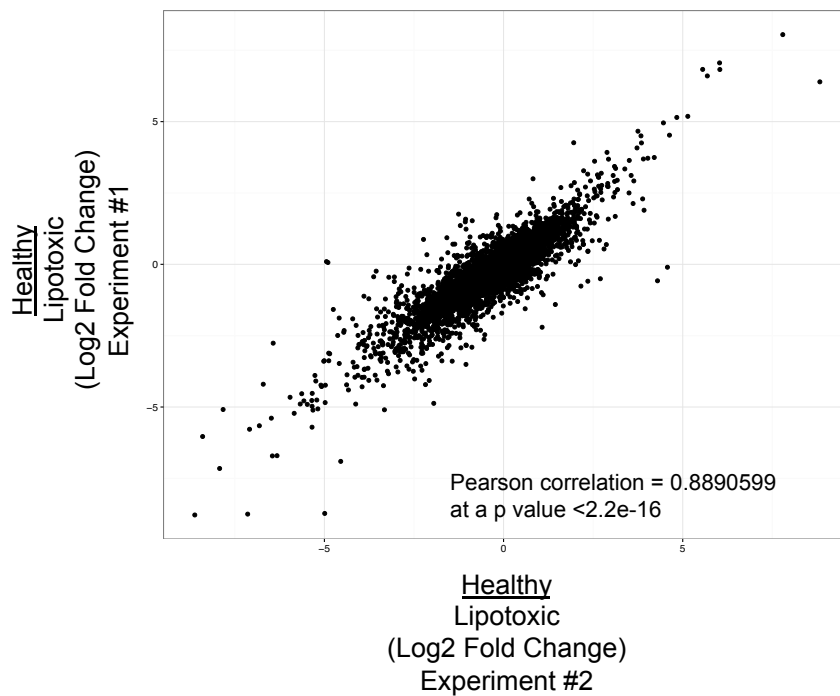

**Supplemental Figure 1. Correlation plot demonstrating the reproducibility of data from different experiments in the lipotoxic system.** Hepatocyte transcriptomic data of all genes (each gene is an individual dot) from two different experiments (#1 and #2) performed 2 months apart with  $n=3$  and  $n=4$  donors, respectively, is represented in this correlation plot. Comparison is healthy vs. lipotoxic + 0.1ng/ml TNF $\alpha$  milieu for each experiment. The scatterplot shows that genes from both experiments exhibit a strong positive correlation in gene response, and thus high reproducibility.

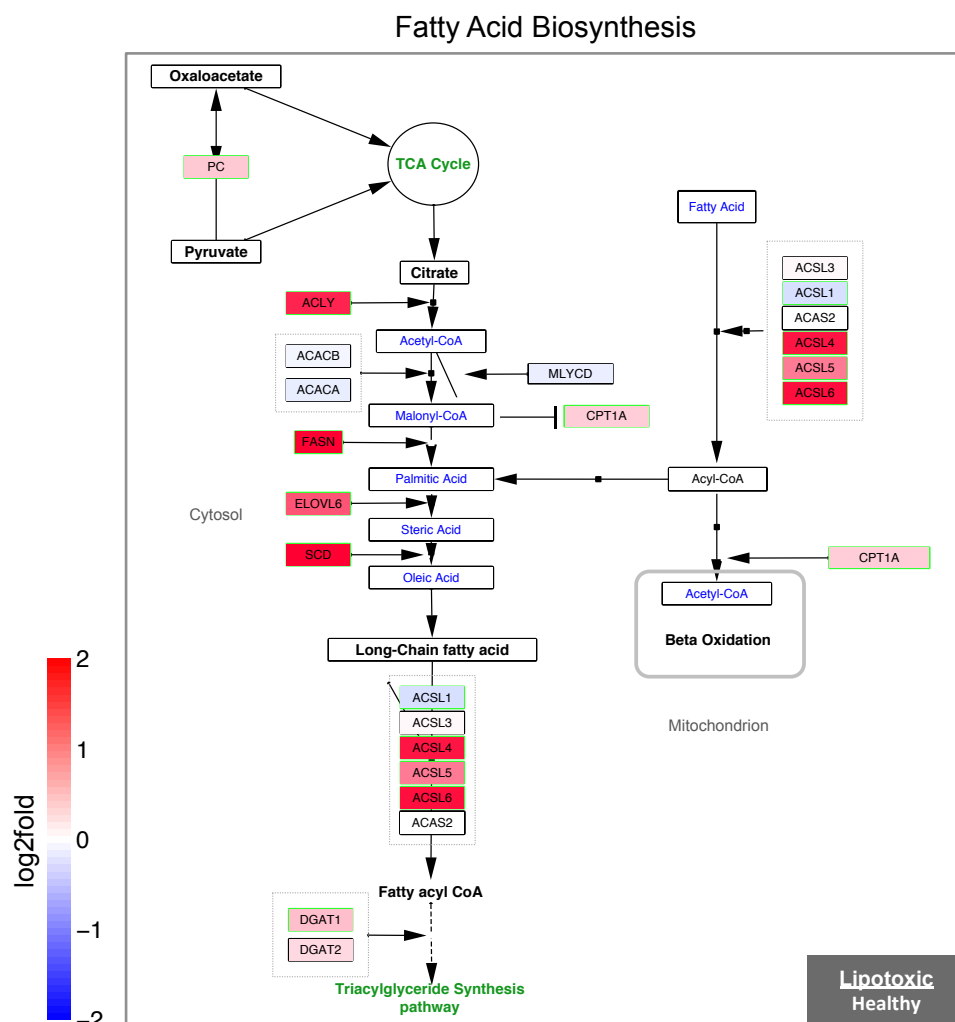

**Supplemental Figure 2. Transcriptomic data from hepatocytes exposed to the lipotoxic compared to the healthy milieu is overlaid onto a diagram representing the fatty acid biosynthesis pathway. A red-filled box indicates the gene is upregulated while a blue-filled box indicates the gene is downregulated; the intensity of the color corresponds to greater log2fold-changes. Boxes with a green perimeter indicate the gene expression log2fold-change is significant (FDR<10%).**

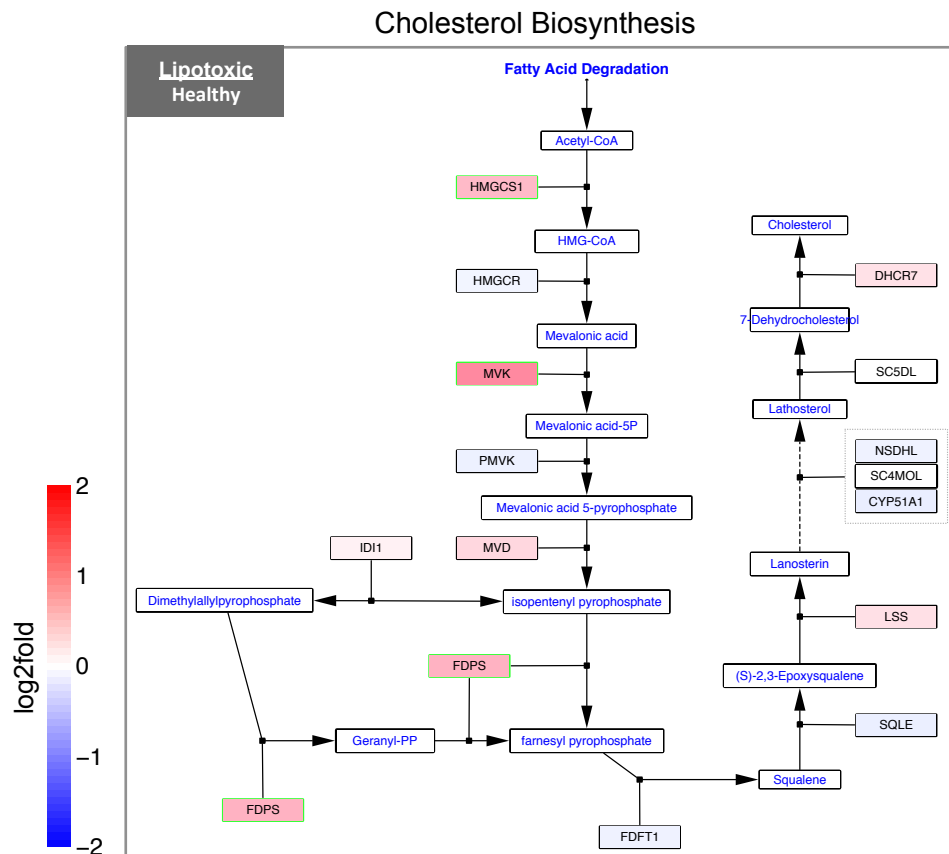

**Supplemental Figure 3. Transcriptomic data from hepatocytes exposed to the lipotoxic compared to the healthy milieu is overlaid onto a diagram representing the cholesterol biosynthesis pathway. A red-filled box indicates the gene is upregulated while a blue-filled box indicates the gene is downregulated; the intensity of the color corresponds to greater log2fold-changes. Boxes with a green perimeter indicate the gene expression log2fold-change is significant (FDR<10%).**

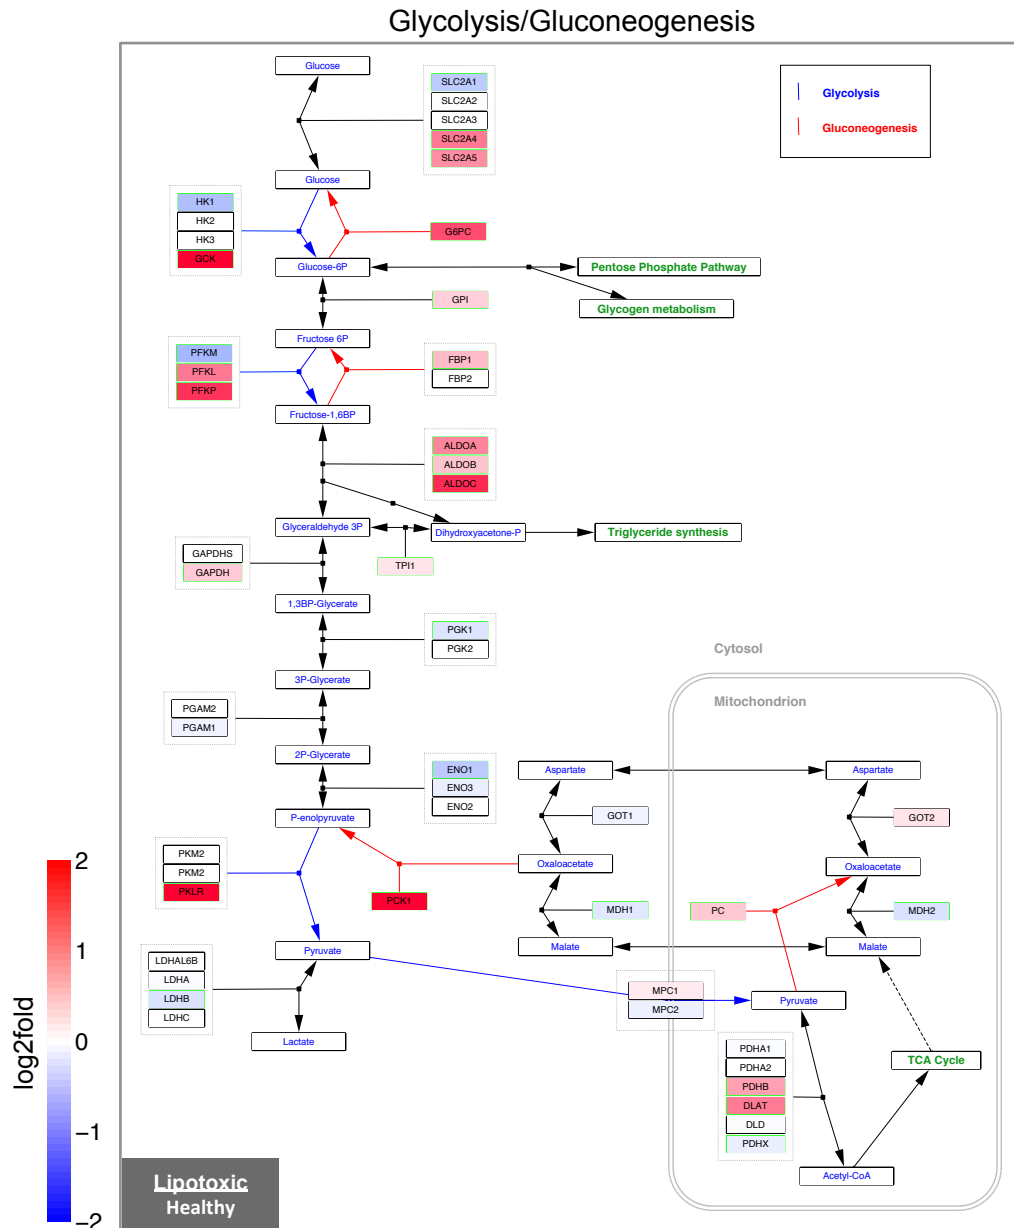

**Supplemental Figure 4. Transcriptomic data from hepatocytes exposed to the lipotoxic compared to the healthy milieu is overlaid onto a diagram representing the glycolysis/gluconeogenesis pathway. A red-filled box indicates the gene is upregulated while a blue-filled box indicates the gene is downregulated; the intensity of the color corresponds to greater log2fold-changes. Boxes with a green perimeter indicate the gene expression log2fold-change is significant (FDR<10%).**

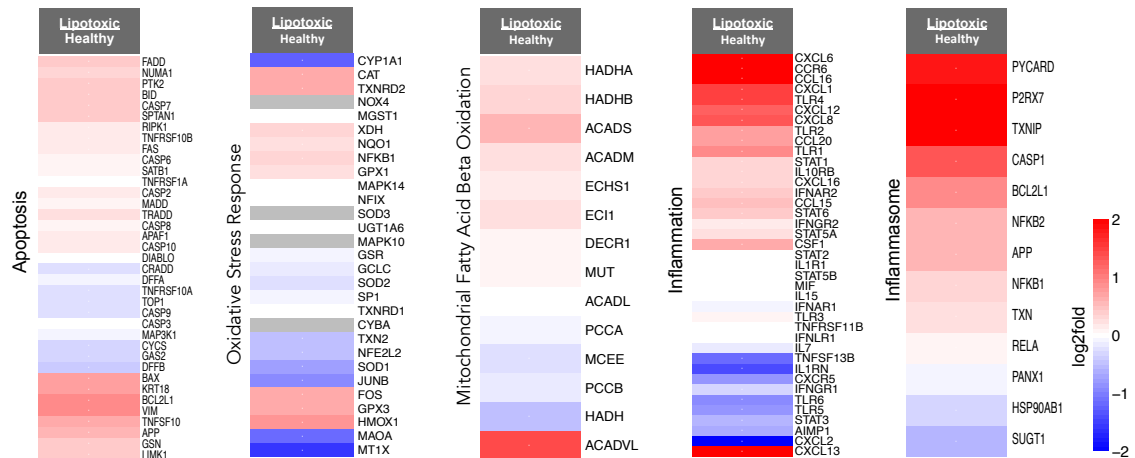

**Supplemental Figure 5. Transcriptomic data from hepatocytes exposed to the lipotoxic compared to the healthy milieu is presented for various biological pathways associated with cellular stress and inflammation. Expression of each gene is represented as log2fold-change of lipotoxic vs. healthy milieu (red=upregulation, blue=downregulation).  $n=6$  experiments, 3 donors.**

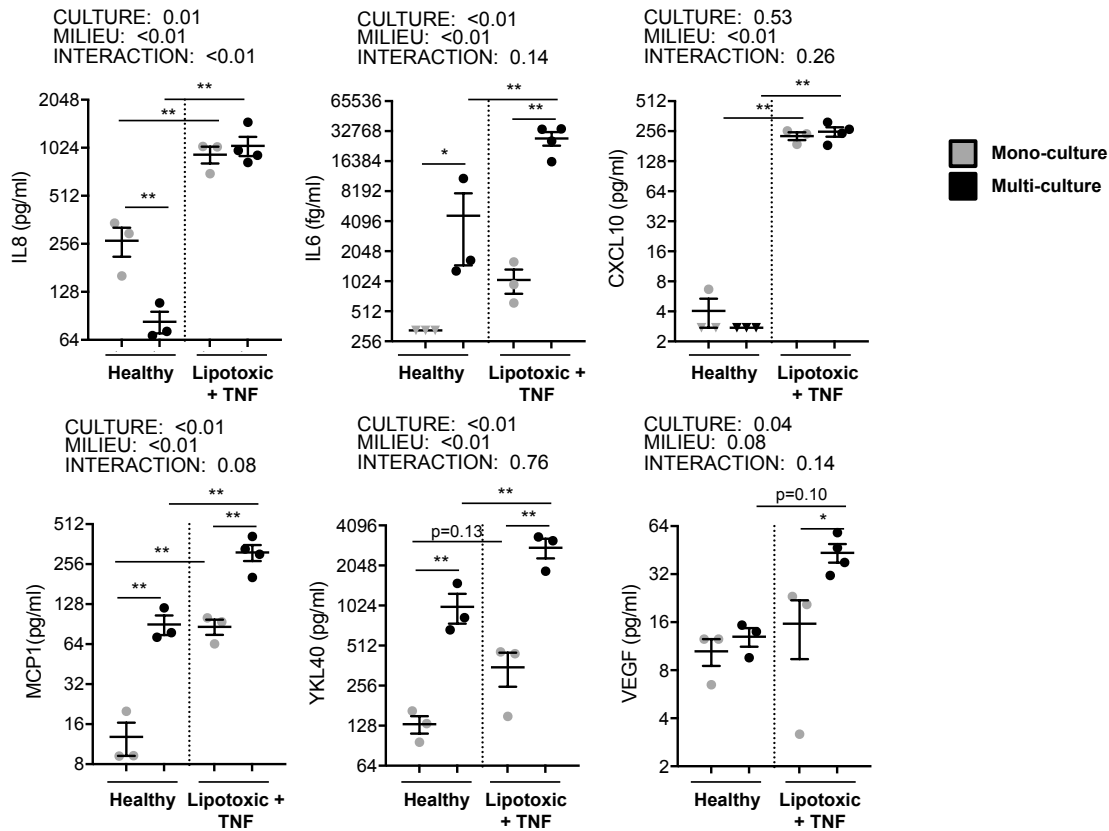

**Supplemental Figure 6. The presence of non-parenchymal cells (NPCs) in the in vitro human liver system significantly impacts its inflammatory profile.** Secreted analytes were measured in the media effluent from devices at day 10. The lipotoxic milieu for these experiments is composed of 65μM oleic acid and 0.1ng/ml TNFα. *n*=4 experiments, 1 donor. Triangles indicate samples were below lower limit of quantification. Tables above charts provide overall significance from 2-way ANOVA for cell culture and milieu treatment conditions and the interaction p-value. Multiple comparison were performed as indicated with \**p*<0.05, \*\**p*<0.01, 2-way ANOVA, Tukey.

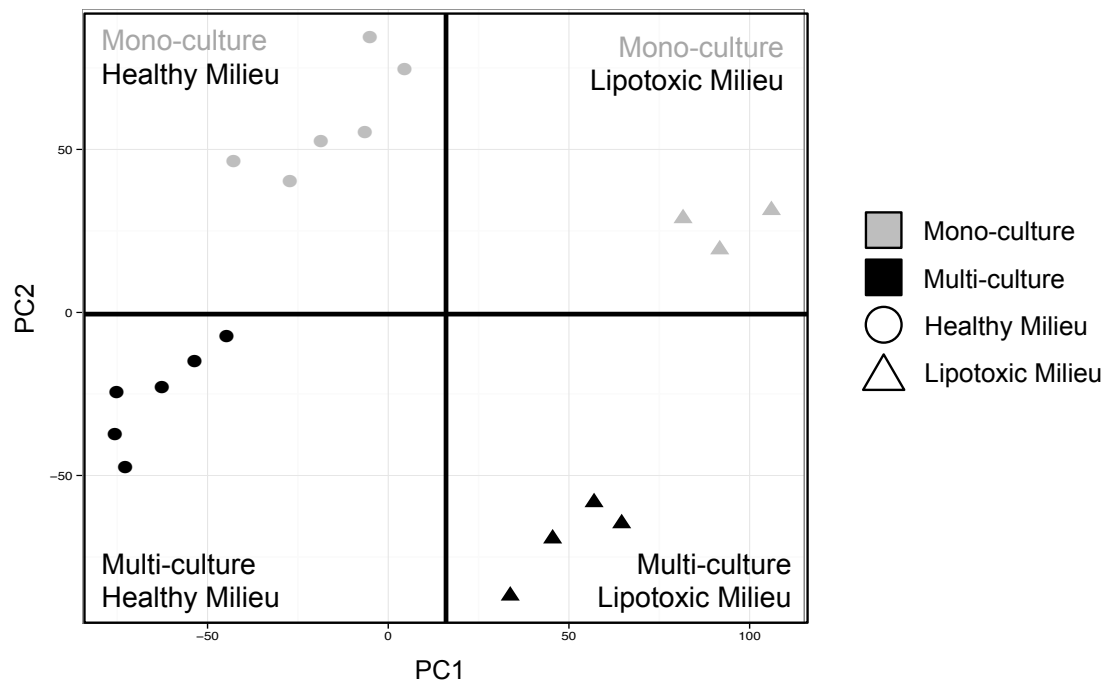

**Supplemental Figure 7. The presence of non-parenchymal cells (NPCs) in the in vitro human liver system significantly impacts the transcriptomic profile of hepatocytes.** Transcriptomic data was acquired from hepatocytes exposed for 10 days to a lipotoxic milieu composed of 65 $\mu$ M oleic acid and 0.1ng/ml TNF $\alpha$  in the presence or absence of NPCs.  $n=3-6$  experiments, 1 donor. Gene expression profile reveals that the hepatocytes from healthy and lipotoxic treatments separate along principle component 1, and these further separate along principle component 2 if co-cultured with NPCs.

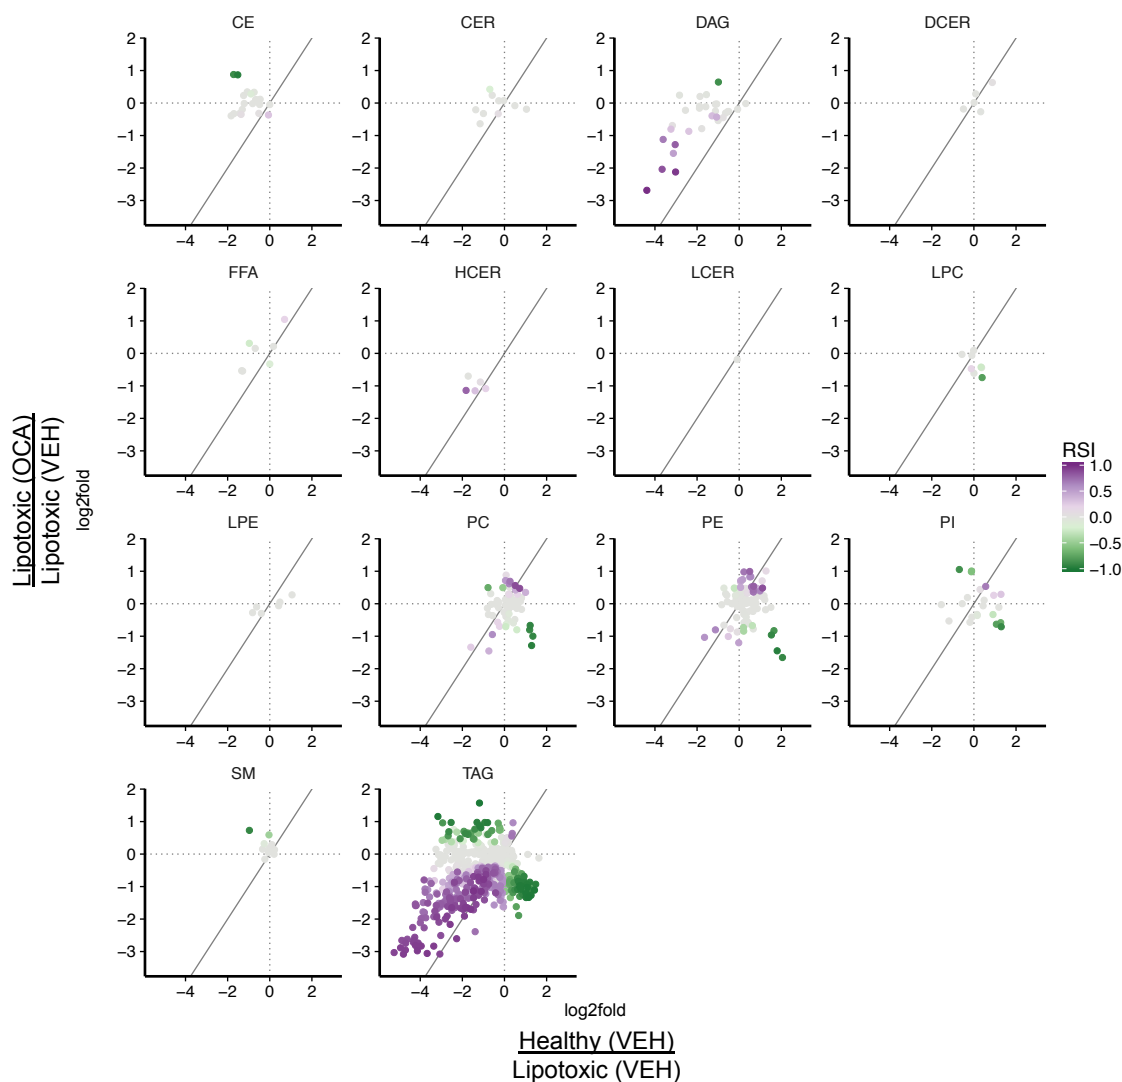

**Supplemental Figure 8. OCA treatment in the lipotoxic milieu promotes a change in lipid profile towards the healthy controls.** Lipids from hepatocytes from device exposed to the healthy or lipotoxic milieu with 0.5 μM OCA or vehicle control were measured by metabolomics. Scatterplot representation of differentially expressed lipids in these hepatocytes are shown as log<sub>2</sub>fold-change and colored by RSI. *n*=4 experiments, 2 donors. Each lipid species is represented in an individual plot: CE (cholesterol ester), CER (ceramide), DAG (diacylglycerol), DCER (dihydroceramide), FFA (free fatty acid), HCER (hexosylceramide), LCER (lactosylceramide), LPC (lysophosphatidylcholine), LPE (lysophosphatidylethanolamine), PC (phosphatidylcholine), PE (phosphatidylethanolamine), PI (phosphatidylinositol), SM (sphingomyelin), TAG (triacylglycerol).

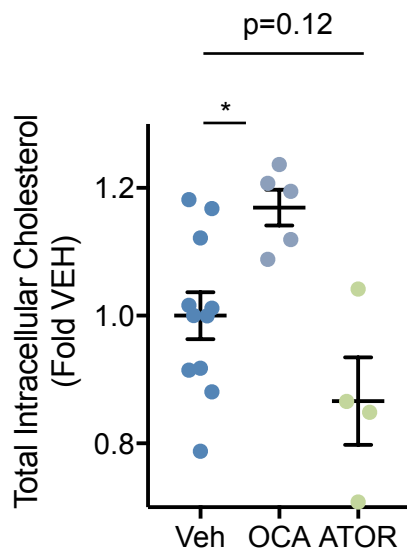

**Supplemental Figure 9. Obeticholic acid (OCA) increases total intracellular cholesterol levels.** Total intracellular cholesterol was measured from hepatocytes from the device exposed to vehicle control, 0.5 $\mu$ M OCA, or 300nM atorvastatin (ator) in the lipotoxic milieu for 10 days and represented as fold change relative to vehicle controls. Atorvastatin serves as a positive control as it inhibits HMG-CoA reductase, the rate-limiting enzyme of the cholesterol-producing mevalonate pathway.  $n=4$  experiments, 4 donors. \* $p<0.05$ , student's 2-tailed t-test.

|                                         | <i>In Vitro</i><br>Model | Figure/Table | References /<br>Reviews |
|-----------------------------------------|--------------------------|--------------|-------------------------|
| Steatosis / Lipogenesis                 | <b>Yes</b>               | Fig 2        | 1-3                     |
| Hypertriglyceremia                      | <b>Yes</b>               | Table 2      | 2-5                     |
| Increased Cholesterol                   | <b>Yes</b>               | Table 2      | 2-5                     |
| Increased Glucose Output                | <b>Yes</b>               | Fig 3A       | 2,3 6                   |
| Insulin Resistance                      | <b>Yes</b>               | Fig 3        | 1-3,6,7                 |
| Cell Stress / Elevated ALT              | <b>Yes</b>               | Fig 4        | 1-3,7,8                 |
| Inflammatory Signaling                  | <b>Yes</b>               | Fig 4        | 2,3,7,8                 |
| Increased Apoptosis                     | <b>Yes</b>               | Fig 4        | 2,3,7-9                 |
| Histological Features (e.g. ballooning) |                          | NA           | 1-3                     |
| Early Fibrosis                          | <b>Yes</b>               | Fig 5        | 2,3,7,10                |
| Advanced Fibrosis                       |                          | Fig 5        | 2,3,10                  |
| Cirrhosis                               |                          | NA           | 2,3,10                  |
| Oncogenesis                             |                          | NA           | 2,3                     |

**Supplemental Table 1. Pathological features of NAFLD in the *in vitro* human liver lipotoxic system.**

| Donor | Donor ID  | Age | Gender | BMI | Vendor   |
|-------|-----------|-----|--------|-----|----------|
| 1     | HC5-30    | 21  | Male   | 25  | XenoTech |
| 2     | QHuf14024 | 55  | Female | 29  | QPS      |
| 3     | QHuf15028 | 58  | Female | 21  | QPS      |
| 4     | HC3-31    | 42  | Female | 31  | XenoTech |
| 5     | QHu13035  | 39  | Male   | 30  | QPS      |

**Supplemental Table 2. Hepatic donors used in this study with their sourcing details and demographic information.**

### Supplemental References:

- (1) Sass DA, Chang P, Chopra KB. Nonalcoholic fatty liver disease: a clinical review. *Dig Dis Sci* 2005;50:171-180.
- (2) Paschos P, Paletas K. Non alcoholic fatty liver disease and metabolic syndrome. *Hippokratia* 2009;13:9-19.
- (3) Marra F, Lotersztajn S. Pathophysiology of NASH: perspectives for a targeted treatment. *Curr Pharm Des* 2013;19:5250-5269.
- (4) Donnelly KL, Smith CI, Schwarzenberg SJ, Jessurun J, Boldt, MD, Parks EJ. Sources of fatty acids stored in liver and secreted via lipoproteins in patients with nonalcoholic fatty liver disease. *J Clin Invest* 2005;115:1343-1351.
- (5) Puri P, Baillie RA, Wiest MM, Mirshahi F, Choudhury J, Cheung O, et al. A lipidomic analysis of nonalcoholic fatty liver disease. *Hepatology* 2007;46:1081-1090.
- (6) Chitturi S, Abeygunasekera S, Farrell GC, Holmes-Walker J, Hui, J.M., Fung C, et al. NASH and insulin resistance: Insulin hypersecretion and specific association with the insulin resistance syndrome. *Hepatology* 2002;35:373-379.
- (7) Basaranoglu M, Basaranoglu G, Senturk H. From fatty liver to fibrosis: a tale of "second hit". *World J Gastroenterol* 2013;19:1158-1165.
- (8) Takaki A, Kawai D, Yamamoto K. Multiple hits, including oxidative stress, as pathogenesis and treatment target in non-alcoholic steatohepatitis (NASH). *Int J Mol Sci* 2013;14:20704-20728.

- (9) Wieckowska A, Zein NN, Yerian LM, Lopez AR, McCullough AJ, Feldstein AE. In vivo assessment of liver cell apoptosis as a novel biomarker of disease severity in nonalcoholic fatty liver disease. *Hepatology* 2006;44:27-33.
- (10) Friedman SL. Hepatic stellate cells: protean, multifunctional, and enigmatic cells of the liver. *Physiol Rev* 2008;88:125-172.
